# Supplementary material for: Mitochondria-targeting nanoparticles for enhanced microwave ablation of cancer
Source: Royal Society of Chemistry journal article supplement (doi:10.1039/c8nr03927e), 2018-01-01
Supplement: c8nr03927e1.pdf [file c8nr03927e1.pdf]

## Mitochondria-Targeting Nanoparticles for Enhanced Microwave Ablation of Cancer

Xiaowei Chen,<sup>a</sup> Changhui Fu,<sup>b</sup> Yaqin Wang,<sup>a</sup> Qirun Wu,<sup>a</sup> Xianwei Meng,<sup>\*b</sup>  
and Ke Xu,<sup>\*a</sup>

a.Department of Radiology ,First Hospital of China Medical University, Shenyang 110001, People's Republic of China.

b.Laboratory of Controllable Preparation and Application of Nanomaterials, Laboratory of Cryogenics, Technical Institute of Physics and Chemistry, Chinese Academy of Sciences, Beijing, 100190, People's Republic of China

To determine the concentration of MZCNs in the follow-up experiment. The experiment was divided into six groups, the HepG2 cells were added into 96-well plates to incubate for 8h, and than treated with different concentrations of MZCNs (10, 50,100,200,400 and 600ug/ml) with HepG<sub>2</sub> hepatoma cells for 24 hours, and the inhibition of cell proliferation by MZCNs at different concentrations was measured by CCK-8 test. The results are shown in Figure S1.

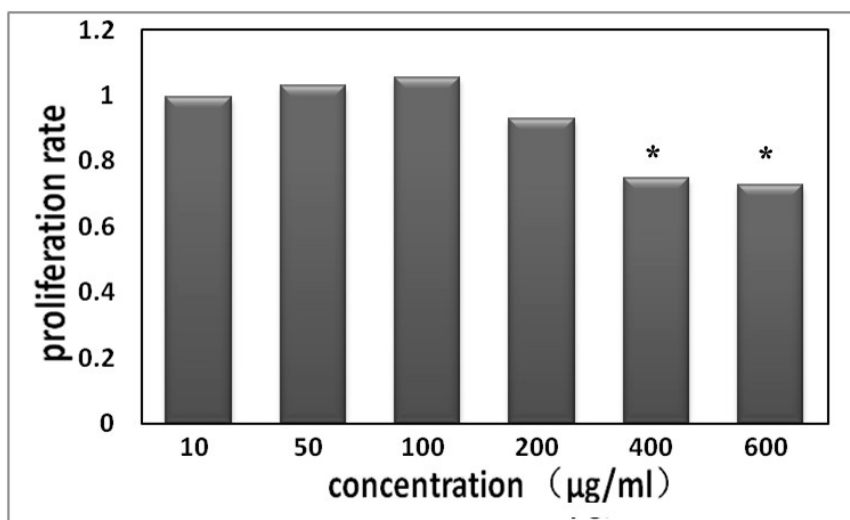

Figure S1: Figure 7: Inhibition of proliferation of HepG2 cells by MZCNs at different concentration , \*: The difference was statistically significant compared with the control group.

The proliferation of HepG2 cells in the range of MZCNs concentration 10ug/ml to 100ug/ml was not inhibited compared with the control group, and the proliferation rate at 200ug/ml concentration was 92.8%,  $p>0.05$ , and the difference was not statistically significant. When MZCNs concentration was 400ug/ml, the cell proliferation was inhibited. The proliferation rate was 74.8%, and the proliferation rate of  $p<0.05$  and MZCNs 600ug/ml was 72.7%,  $p<0.05$ . In order to avoid MZCNs's inhibition of cell proliferation in cell warming, 100ug/ml and 200ug/ml were selected. In flow cytometry, the concentration of 100ug/ml was selected to avoid the effect of nanomaterial itself on the cell, rather than from the microwave heat treatment.

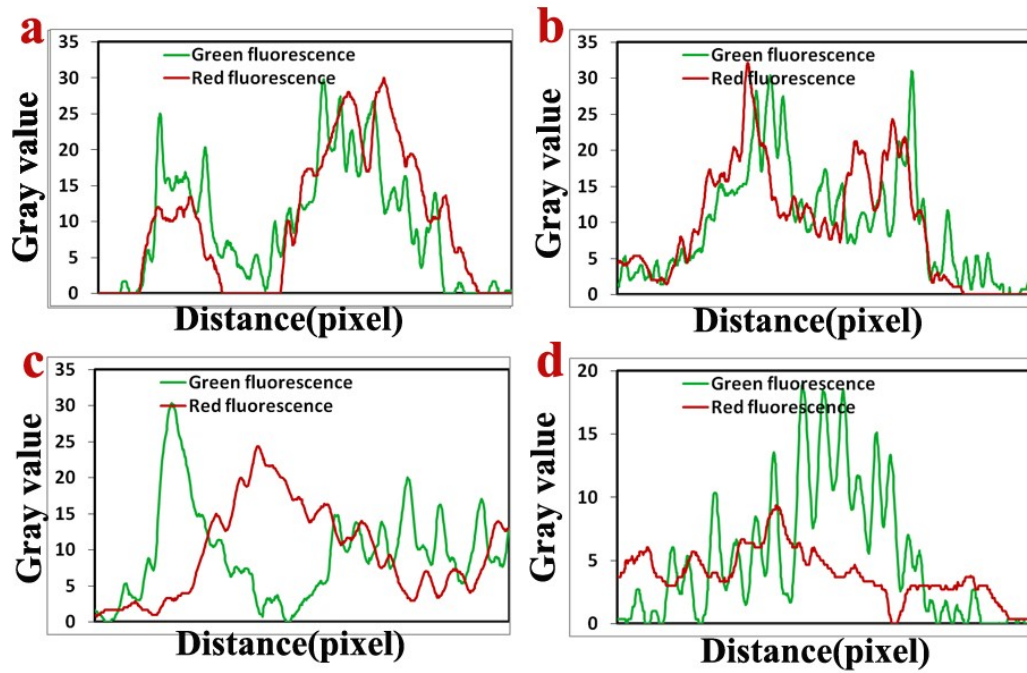

Figure S2: Figure 3: Correlation analysis of Mito-Tracker green (green fluorescence) and DOX (red fluorescence). Picture a: TPP+iRGD  $r=0.78$   $P<0.05$ .; b: TPP  $r=0.721$   $P<0.05$ .; c: iRGD,  $r=-0.369$

$P<0.01$ .; d: non-target,  $r=0.236$ ,  $P<0.01$ . Pearson's  $r$  was analyzed by SPSS Statistics 22.

Through colocalization analysis of the red and green fluorescence, we can find that MZCNs can gather in the mitochondria selectively.
